# Supplementary material for: Changes in Circulating B Cell Subsets Associated with Aging and Acute SIV Infection in Rhesus Macaques
Source: PubMed Central journal article supplement (PMC5240950; doi:10.1371/journal.pone.0170154), 2017-01-17
Supplement: pone.0170154.s001.pdf [file pone.0170154.s001.pdf]

**S1 Table. Age breakdown summary of macaque subjects used in this study.**

|                                                    | Age | Sample number |
|----------------------------------------------------|-----|---------------|
| <b>SPF macaque cohort in CNPRC (44 total)</b>      |     |               |
|                                                    | 1   | 23            |
|                                                    | 2   | 6             |
|                                                    | 3   | 9             |
|                                                    | 4   | 3             |
|                                                    | 5   | 3             |
| <b>Non-SPF macaque cohort in ONPRC (275 total)</b> |     |               |
|                                                    | 2   | 19            |
|                                                    | 3   | 6             |
|                                                    | 4   | 8             |
|                                                    | 5   | 6             |
|                                                    | 6   | 11            |
|                                                    | 7   | 11            |
|                                                    | 8   | 13            |
|                                                    | 9   | 15            |
|                                                    | 10  | 16            |
|                                                    | 11  | 10            |
|                                                    | 12  | 18            |
|                                                    | 13  | 2             |
|                                                    | 14  | 13            |
|                                                    | 15  | 6             |
|                                                    | 16  | 2             |
|                                                    | 17  | 5             |
|                                                    | 18  | 30            |
|                                                    | 19  | 35            |
|                                                    | 20  | 13            |
|                                                    | 21  | 10            |
|                                                    | 22  | 2             |
|                                                    | 23  | 7             |
|                                                    | 24  | 9             |
|                                                    | 25  | 3             |
|                                                    | 27  | 1             |
|                                                    | 28  | 1             |
|                                                    | 29  | 2             |
|                                                    | 30  | 1             |
