# Supplementary material for: Changes in Circulating B Cell Subsets Associated with Aging and Acute SIV Infection in Rhesus Macaques
Source: PubMed Central journal article supplement (PMC5240950; doi:10.1371/journal.pone.0170154), 2017-01-17
Supplement: pone.0170154.s005.pdf [file pone.0170154.s005.pdf]

**S2 Table. Summary of all human subjects used in this study.**

|                               | Age | Gender | Blood type | CMV status |
|-------------------------------|-----|--------|------------|------------|
| <b>Human donor (12 total)</b> |     |        |            |            |
|                               | 26  | M      | A+         | N          |
|                               | 35  | M      | O+         | P          |
|                               | 41  | M      | B+         | N          |
|                               | 44  | M      | A+         | N          |
|                               | 47  | M      | A+         | P          |
|                               | 47  | M      | A+         | N          |
|                               | 51  | F      | O+         | N          |
|                               | 54  | F      | A+         | N          |
|                               | 55  | M      | B+         | N          |
|                               | 56  | M      | O+         | N          |
|                               | 63  | M      | A+         | N          |
|                               | 68  | M      | A+         | N          |

M: male  
F: female  
P: positive  
N: negative
